# Supplementary material for: Chemical bowling-assisted synthesis of Fe3O4@starch-derived carbon composites as anode materials with superior cycling stability for lithium-ion batteries
Source: Royal Society of Chemistry journal article supplement (doi:10.1039/c9nj05599a), 2020-01-01
Supplement: c9nj05599a1.pdf [file c9nj05599a1.pdf]

## Electronic Supplementary Information

### Chemical-bowling Assisted Synthesis of Fe<sub>3</sub>O<sub>4</sub>@Starch Derived Carbon Composites as Anode Materials with Superior Cycling Stability for Lithium-ion Batteries

Wei Shi, Jian Guo \*

Hunan engineering laboratory for preparation technology of polyvinyl alcohol fiber material, college of chemistry and materials engineering, Huaihua University, Huaihua 418000, P. R. China

\*Corresponding author. E-mail address: guoj2013@126.com

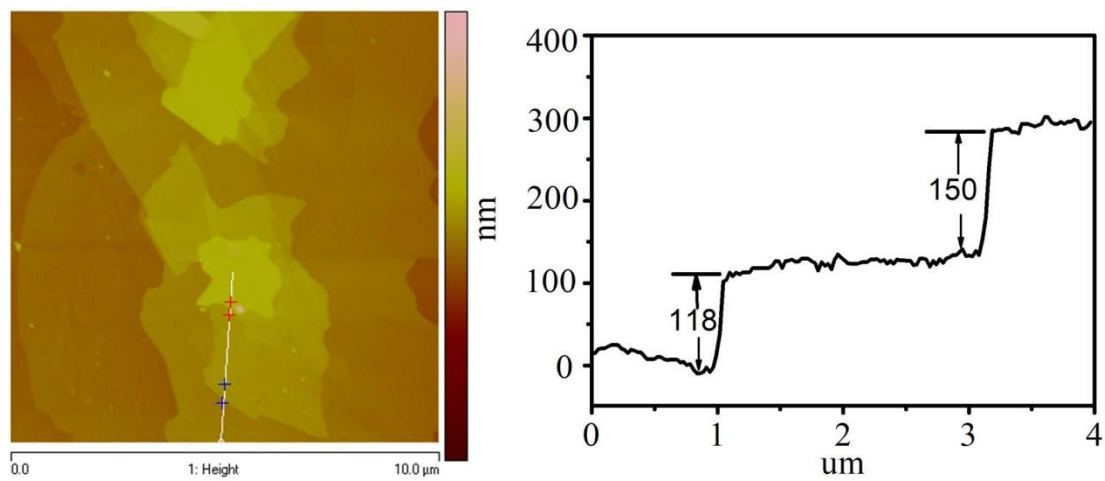

**Figure S1.** AFM image of C-SD.

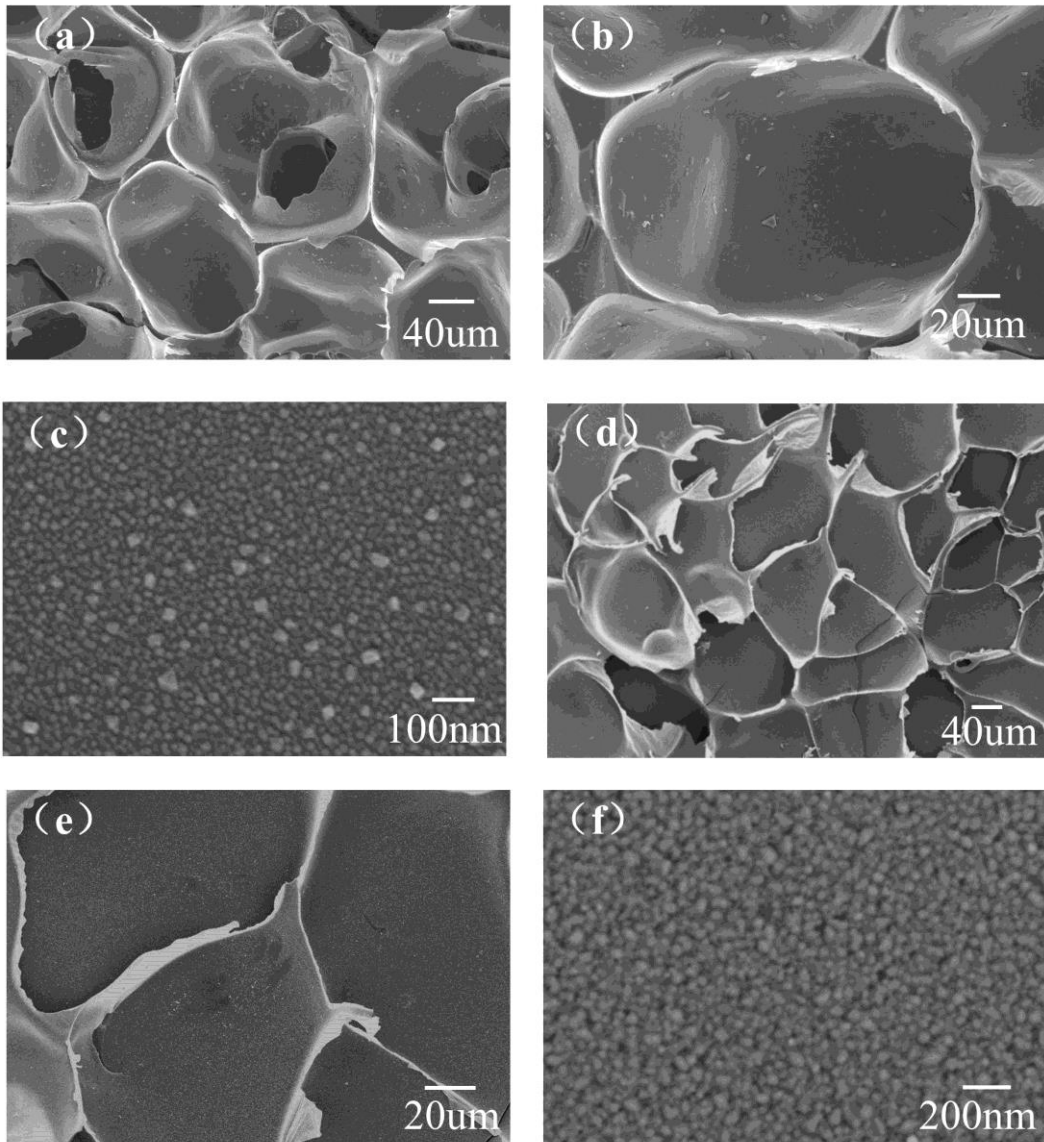

**Figure S2.** (a-c) FESEM images of Fe<sub>3</sub>O<sub>4</sub>@C-SD2 at different resolutions; (d-f) FESEM images of Fe<sub>3</sub>O<sub>4</sub>@C-SD3 composite at different resolution

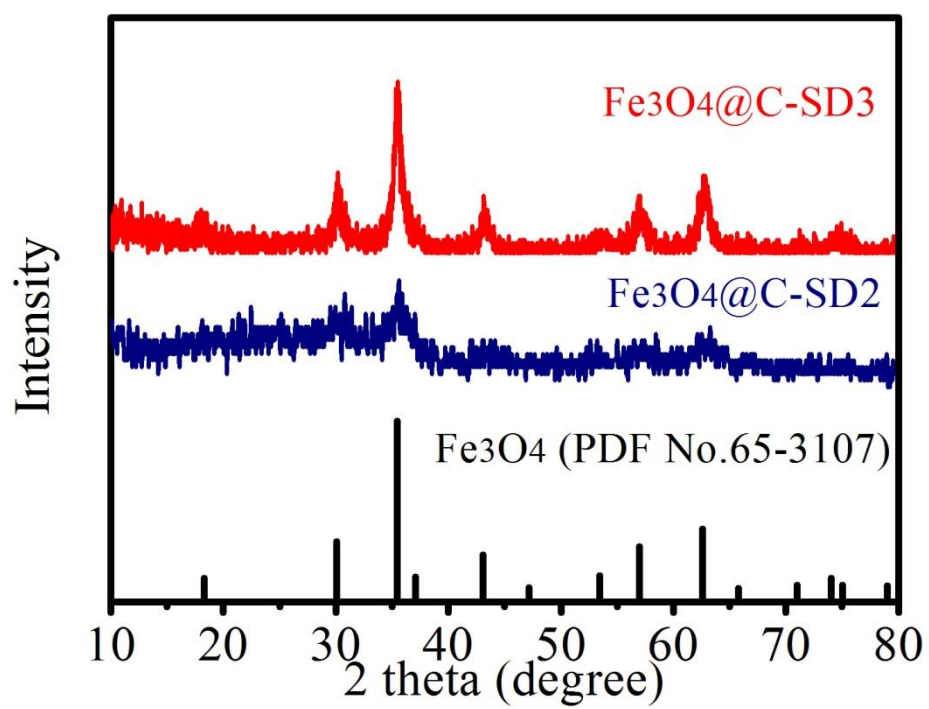

**Figure S3.** XRD patterns of Fe<sub>3</sub>O<sub>4</sub>@C-SD2 and Fe<sub>3</sub>O<sub>4</sub>@C-SD3

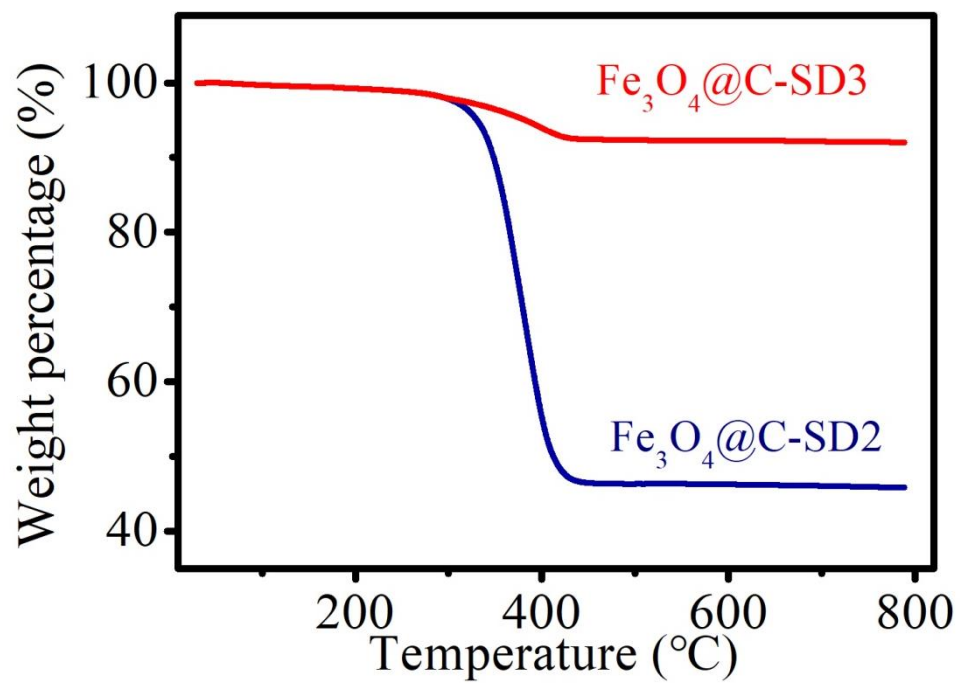

**Figure S4.** The TGA curves of Fe<sub>3</sub>O<sub>4</sub>@C-SD2 and Fe<sub>3</sub>O<sub>4</sub>@C-SD3.

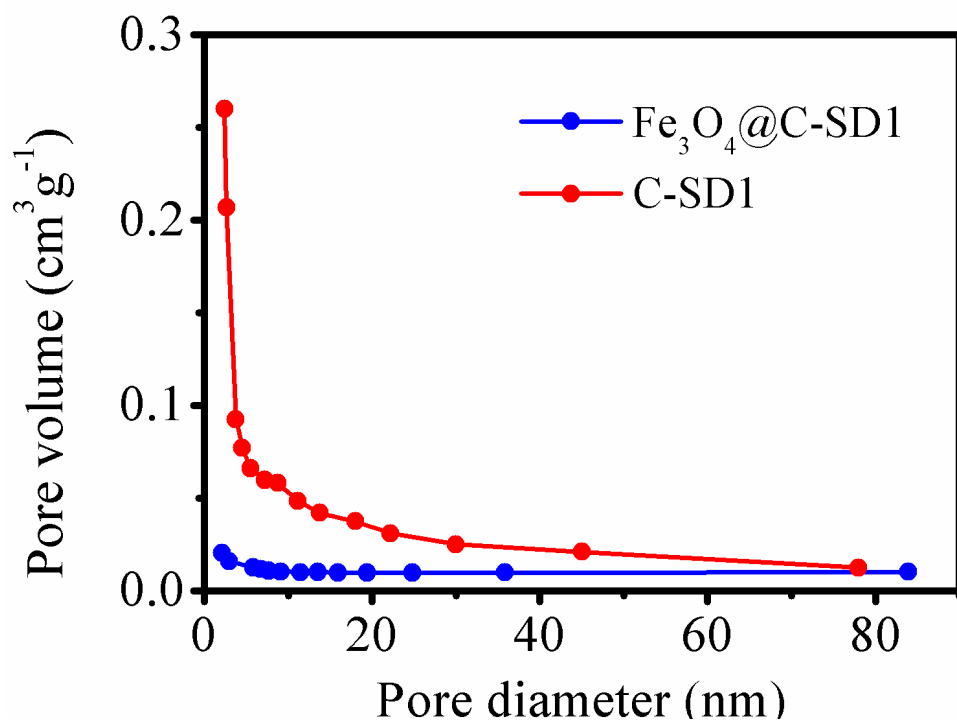

**Figure S5.** Pore size distribution of Fe<sub>3</sub>O<sub>4</sub>@C-SD1 and C-SD

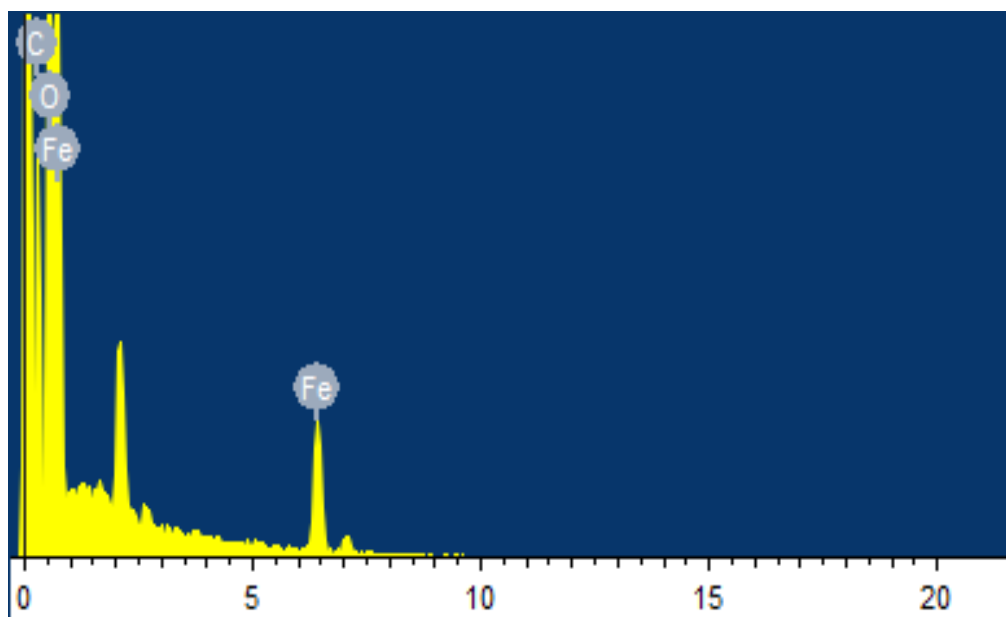

**Figure S6.** EDAX pattern of Fe<sub>3</sub>O<sub>4</sub>@C-SD1.

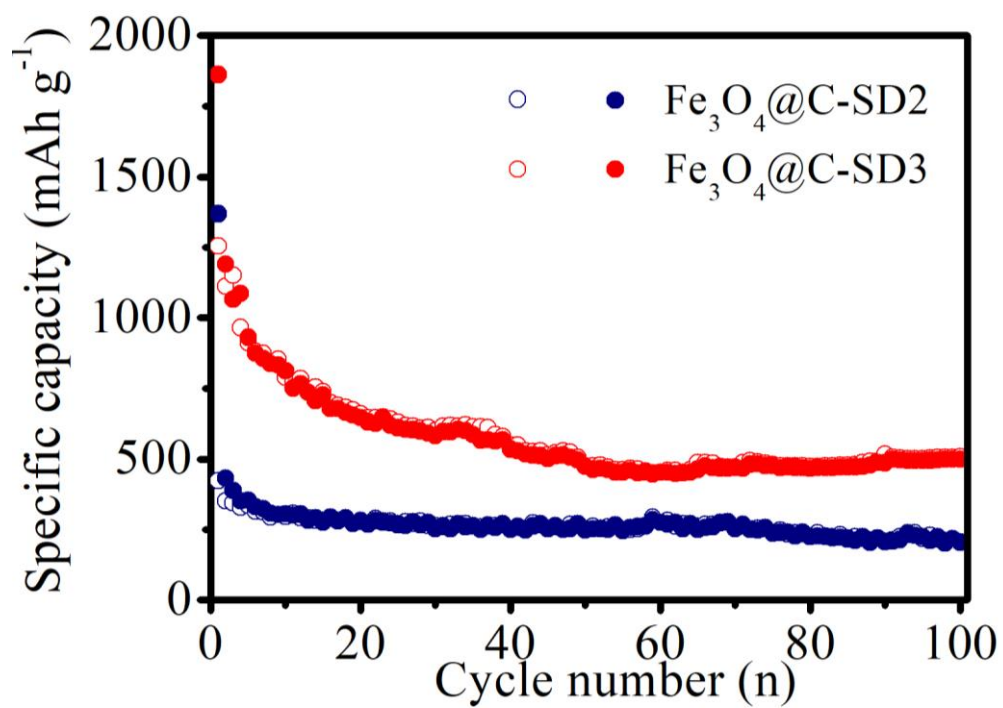

**Figure S7.** Cycling performance of Fe<sub>3</sub>O<sub>4</sub>@C-SD2 and Fe<sub>3</sub>O<sub>4</sub>@C-SD3 electrodes performed at current density of 0.2 A g<sup>-1</sup>.



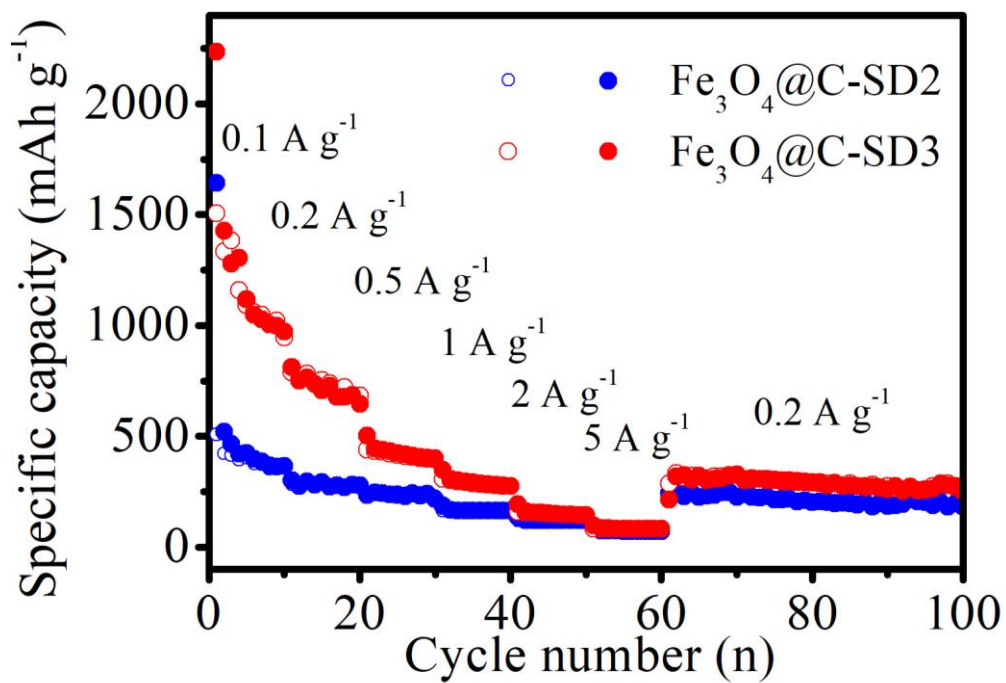

**Figure S8.** Rate performance of Fe<sub>3</sub>O<sub>4</sub>@C-SD2 and Fe<sub>3</sub>O<sub>4</sub>@C-SD3 electrodes

performed at various current densities.

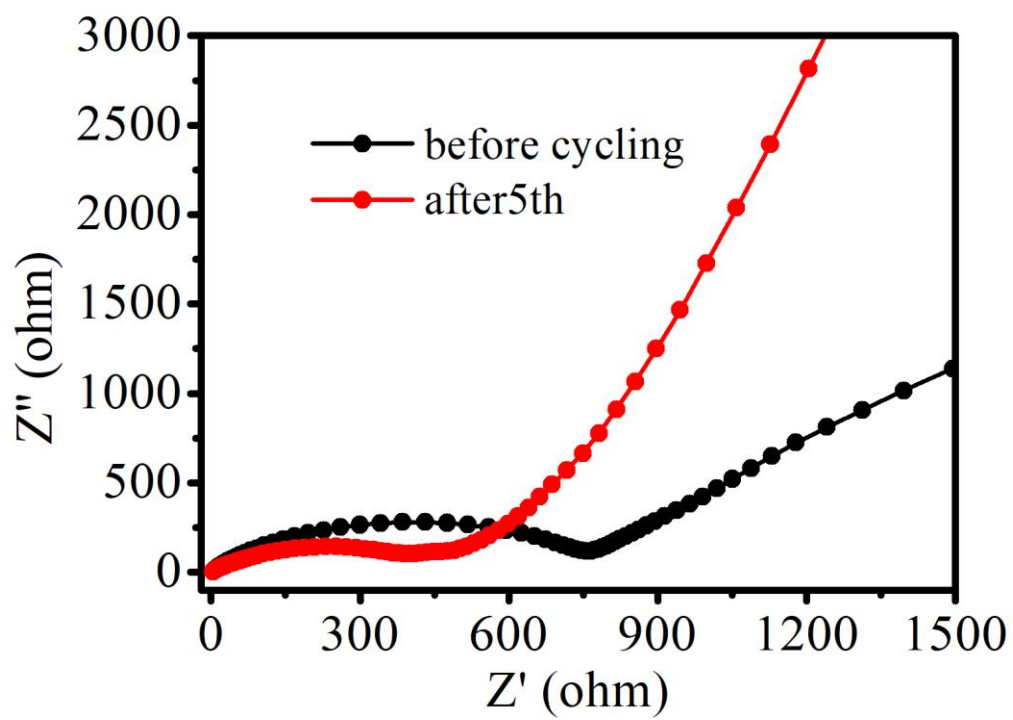

**Figure S9.**EIS spectrum of Fe<sub>3</sub>O<sub>4</sub>@C-SD1 electrode before cycling and after 5th cycles.
